# Supplementary material
Source: PubMed Central journal article supplement (PMC8346233)
Supplement: mmc1.pdf [file mmc1.pdf]

**Supplemental information**

**SARS-CoV-2 infection induces**

**beta cell transdifferentiation**

**Xuming Tang, Skyler Uhl, Tuo Zhang, Dongxiang Xue, Bo Li, J. Jeya Vandana, Joshua A. Acklin, Lori L. Bonnycastle, Narisu Narisu, Michael R. Erdos, Yaron Bram, Vasuretha Chandar, Angie Chi Nok Chong, Laretta A. Lacko, Zaw Min, Jean K. Lim, Alain C. Borczuk, Jenny Xiang, Ali Naji, Francis S. Collins, Todd Evans, Chengyang Liu, Benjamin R. tenOever, Robert E. Schwartz, and Shuibing Chen**

**SUPPLEMENTAL INFORMATION**

**Supplemental Figure S1-S7 and Tables S1-S5.**

Figure S1

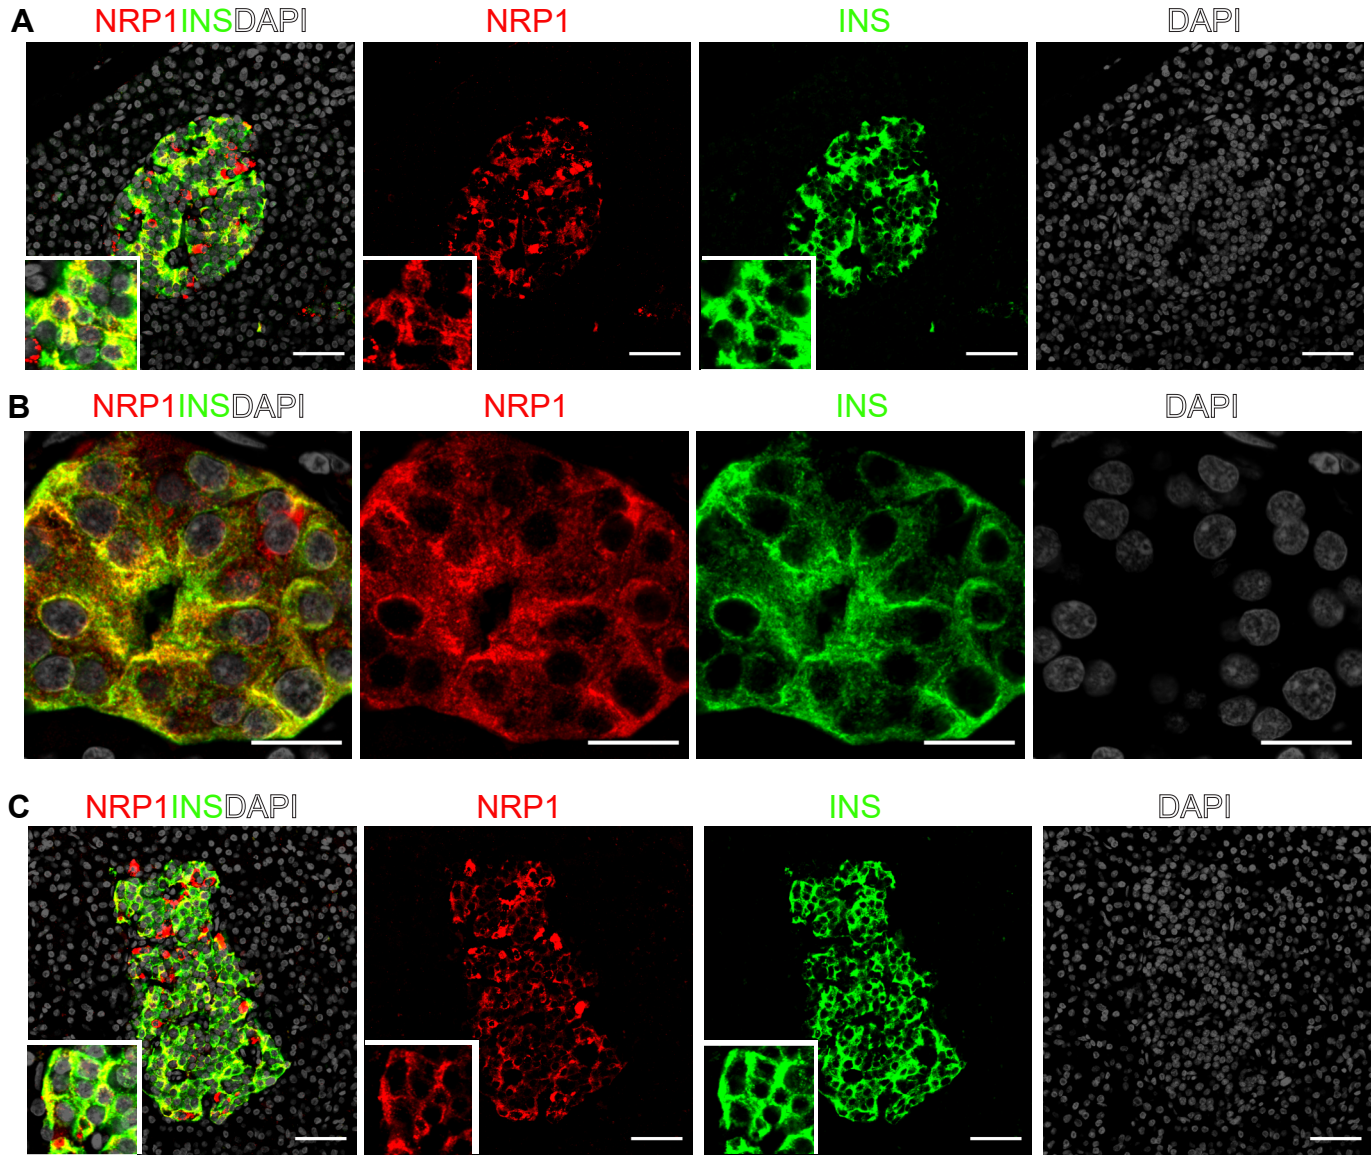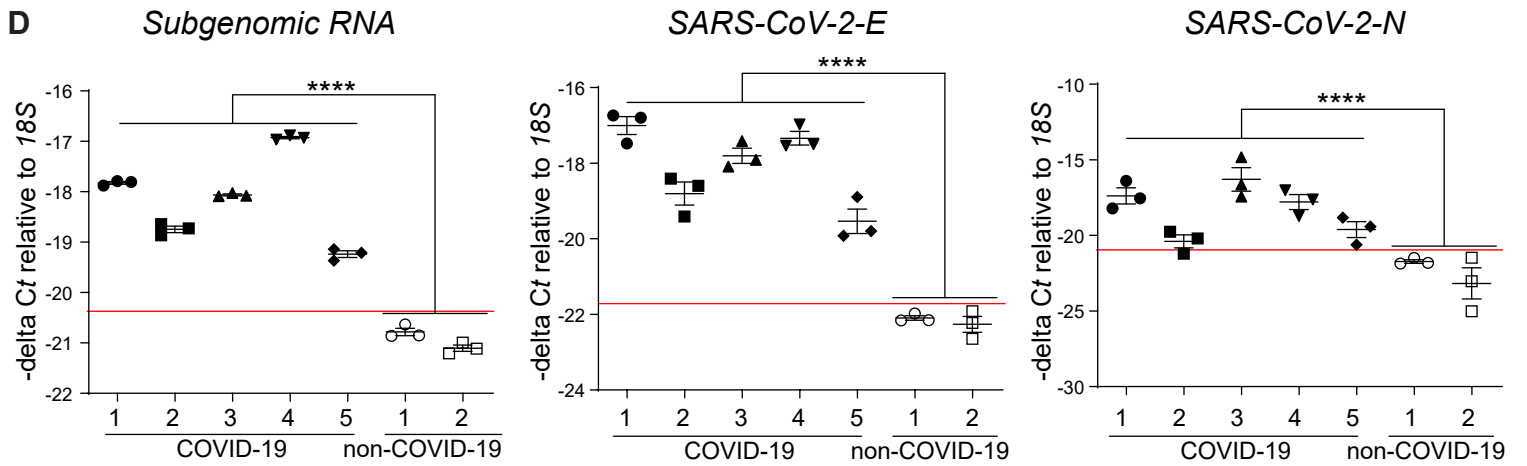

## SUPPLEMENTAL FIGURES.

### Figure S1. Related to Figure 1 and 2. Immunostaining and qRT-PCR analysis of the autopsy pancreas samples of a non-COVID-19 and COVID-19 subjects.

(A) A representative image of NRP1 expression in the autopsy pancreas sample of a non-COVID-19 subject. 20X confocal image using NRP1 antibody from abcam. The insert represents a high-resolution image from the larger field. Scale bar = 50  $\mu\text{m}$ . ( $n = 6$  images examined in total) Red: NRP1; Green: INS; Grey: DAPI.

(B) A representative image of NRP1 in the autopsy pancreas sample of a non-COVID-19 subject. 63X confocal image using NRP1 antibody from NOVUS. Scale bar = 20  $\mu\text{m}$ . ( $n = 2$  images examined in total) Red: NRP1; Green: INS; Grey: DAPI.

(C) A representative image of NRP1 in the autopsy pancreas sample of a non-COVID-19 subject. 20X confocal image using NRP1 antibody from NOVUS. The insert represents a high-resolution image from the larger field. Scale bar = 50  $\mu\text{m}$ . ( $n = 6$  images examined in total) Red: NRP1; Green: INS; Grey: DAPI.

(D) qRT-PCR analysis of *subgenomic RNA*, *SARS-CoV-2-E*, *SARS-CoV-2-N* in the autopsy pancreas samples of non-COVID-19 and COVID-19 subjects.  $-\Delta\text{Ct} = \text{Ct}(18\text{S}) - \text{Ct}(\text{subgenomic RNA, SARS-CoV-2-E, or SARS-CoV-2-N})$ . Red line highlights the detection limit. Data was presented as mean  $\pm$  STDEV.  $P$  values were calculated by one-way ANOVA, \*\*\*\* $P < 0.0001$ .

**Figure S2**

**A**

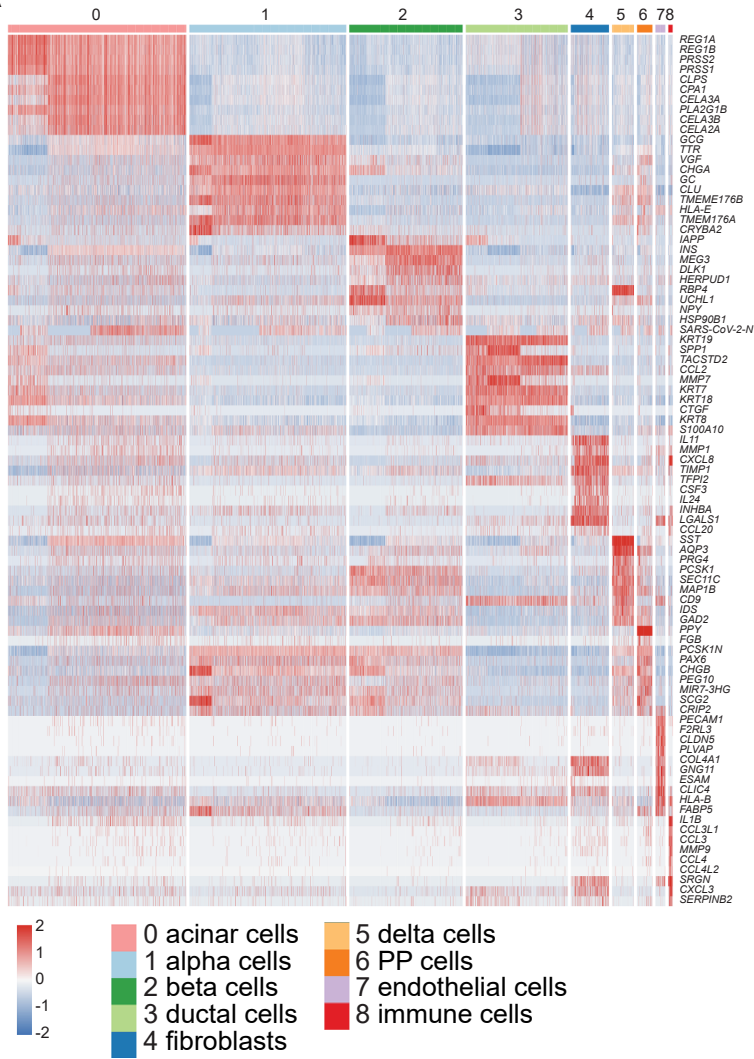

**B**

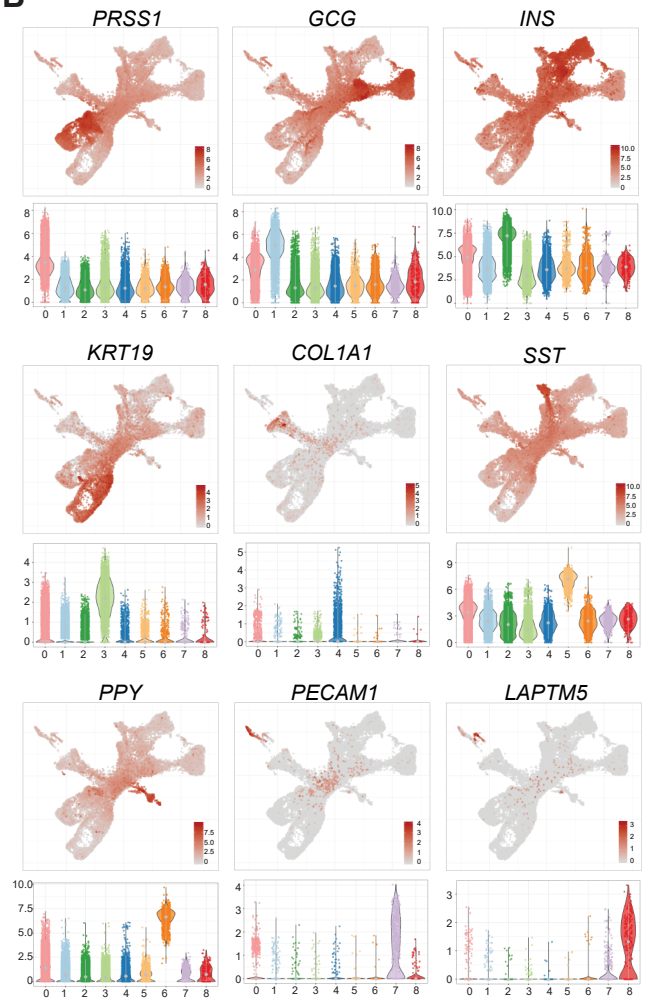

**C**

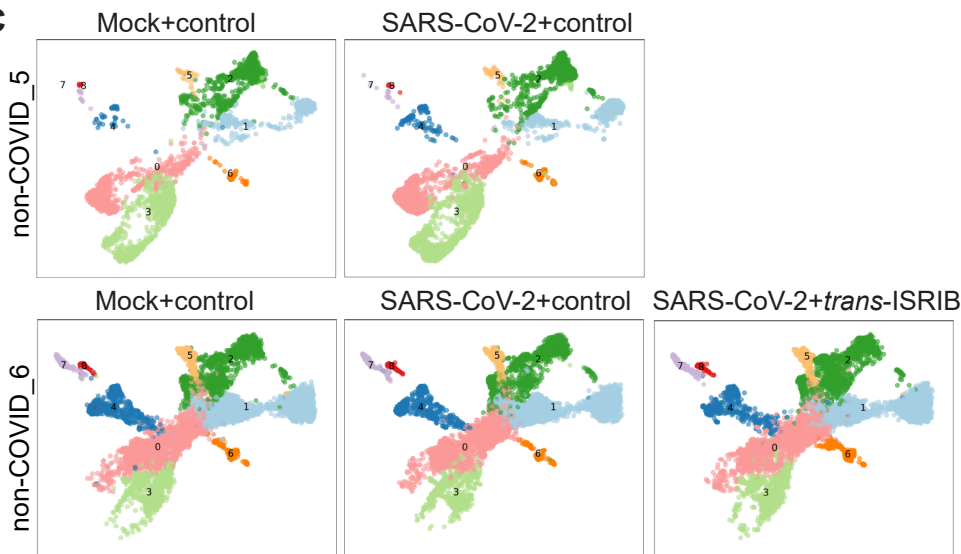

**Figure S2. Related to Figure 2. Single-cell RNA-seq analysis of mock versus SARS-CoV-2 infected human islets.**

(A) Heatmap showing relative expression of top 10 markers defining the nine cell types in human islets. ( $n = 2$  individual islet donors).

(B) UMAP and violin plots showing expression levels of pancreatic cell markers. ( $n = 2$  individual islet donors).

(C) UMAP of human islets by conditions.

**Figure S3**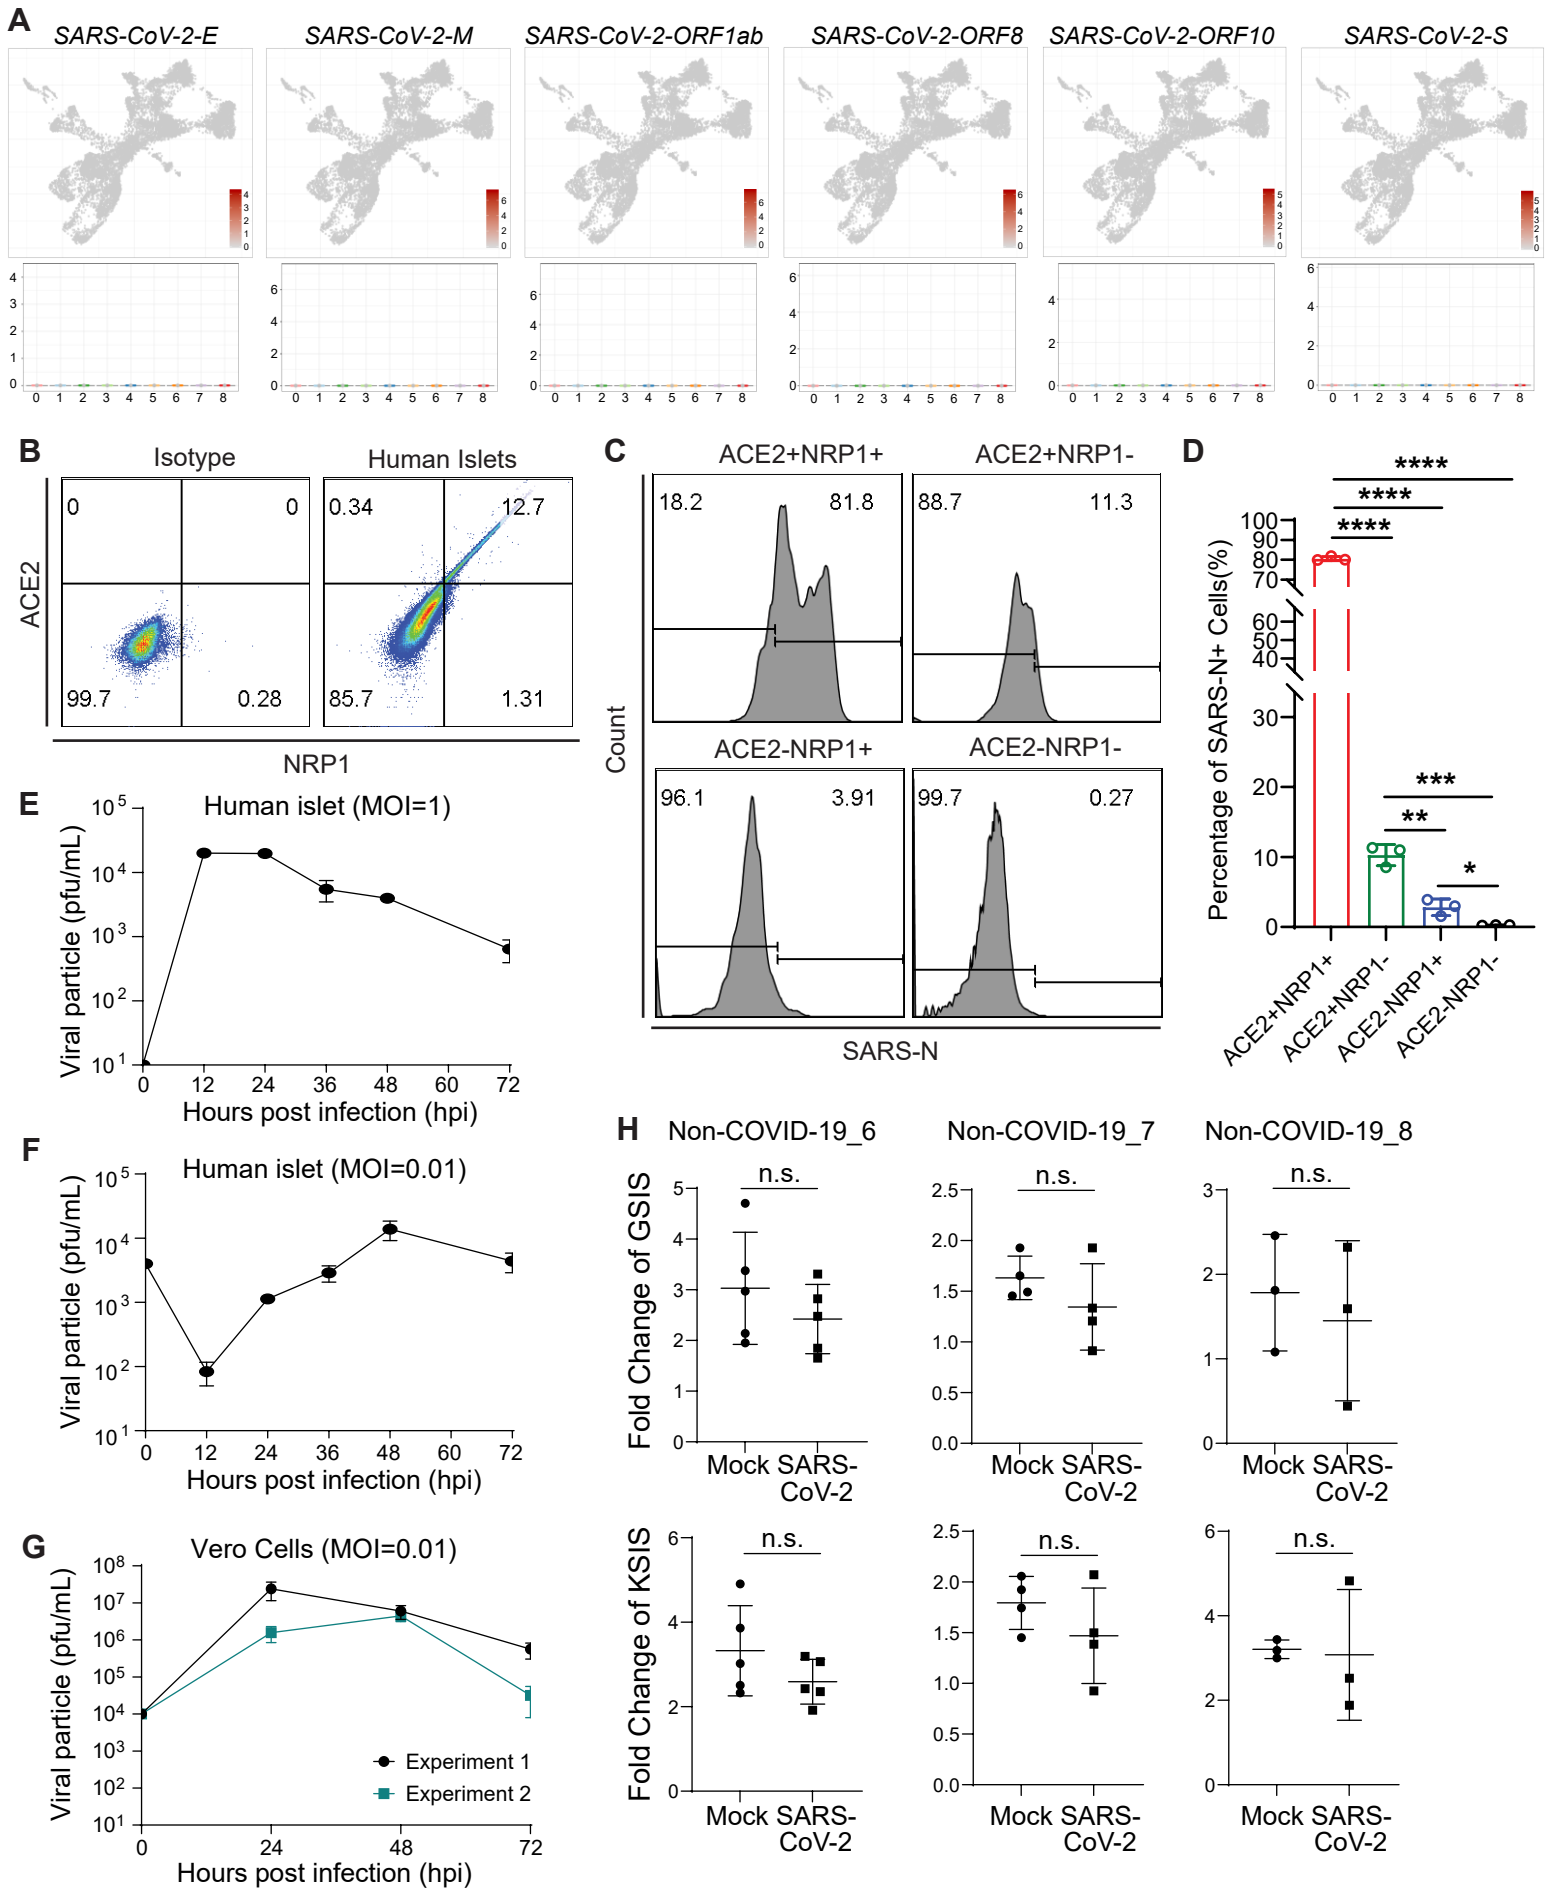

**Figure S3. Related to Figure 2. SARS-CoV-2 infects multiple types of human pancreatic cells.**

(A) UMAP and violin plots showing the expression levels of SARS-CoV-2 genes of mock infected human islets. ( $n = 2$  individual islet donors).

(B and C) Flow cytometry analysis of SARS-CoV-2 (MOI=1) infected human islets at 48 hpi. Gating strategy of ACE2 and NRP1 (B). SARS-N expression in ACE2<sup>+</sup>/NRP1<sup>+</sup>, ACE2<sup>-</sup>/NRP1<sup>+</sup>, ACE2<sup>+</sup>/NRP1<sup>-</sup>, and ACE2<sup>-</sup>/NRP1<sup>-</sup> cells (C).  $n = 3$  replicates.

(D) Quantification of SARS-N<sup>+</sup> percentage in ACE2<sup>+</sup>/NRP1<sup>+</sup>, ACE2<sup>+</sup>/NRP1<sup>-</sup>, ACE2<sup>-</sup>/NRP1<sup>+</sup>, and ACE2<sup>-</sup>/NRP1<sup>-</sup> cells.

(E) Plaque assays of SARS-CoV-2 (MOI=1) infected human islets at 12, 24, 36, 48, 60, and 72 hpi ( $n = 3$  replicates per time point) with replacement of media and 3 times washes after initial 3 hr infection.

(F) Plaque assays of SARS-CoV-2 (MOI=0.01) infected human islets at 12, 24, 36, 48, 60 and 72 hpi ( $n = 3$  replicates per time point).

(G) Plaque assays of SARS-CoV-2 (MOI=0.01) infected Vero cells at 24, 48, and 72 hpi ( $n = 3$  replicates per time points from two individual experiments).

(H) Fold change of glucose stimulated insulin secretion (GSIS) or KCl stimulated insulin secretion (KSIS) of SARS-CoV-2 (MOI=1) infected human islets. Human islets from non-COVID-19\_6 ( $n = 5$  replicates per condition) and non-COVID-19\_7 ( $n = 4$  replicates per condition) were analyzed at 48 hpi. Human islets from non-COVID-19\_8 ( $n = 3$  replicates per condition) were analyzed at 72 hpi.

Data was presented as mean  $\pm$  STDEV.  $P$  values were calculated by two-way ANOVA. \* $P < 0.05$ , \*\* $P < 0.01$ , \*\*\* $P < 0.001$  and \*\*\*\* $P < 0.0001$ .



**Figure S4**

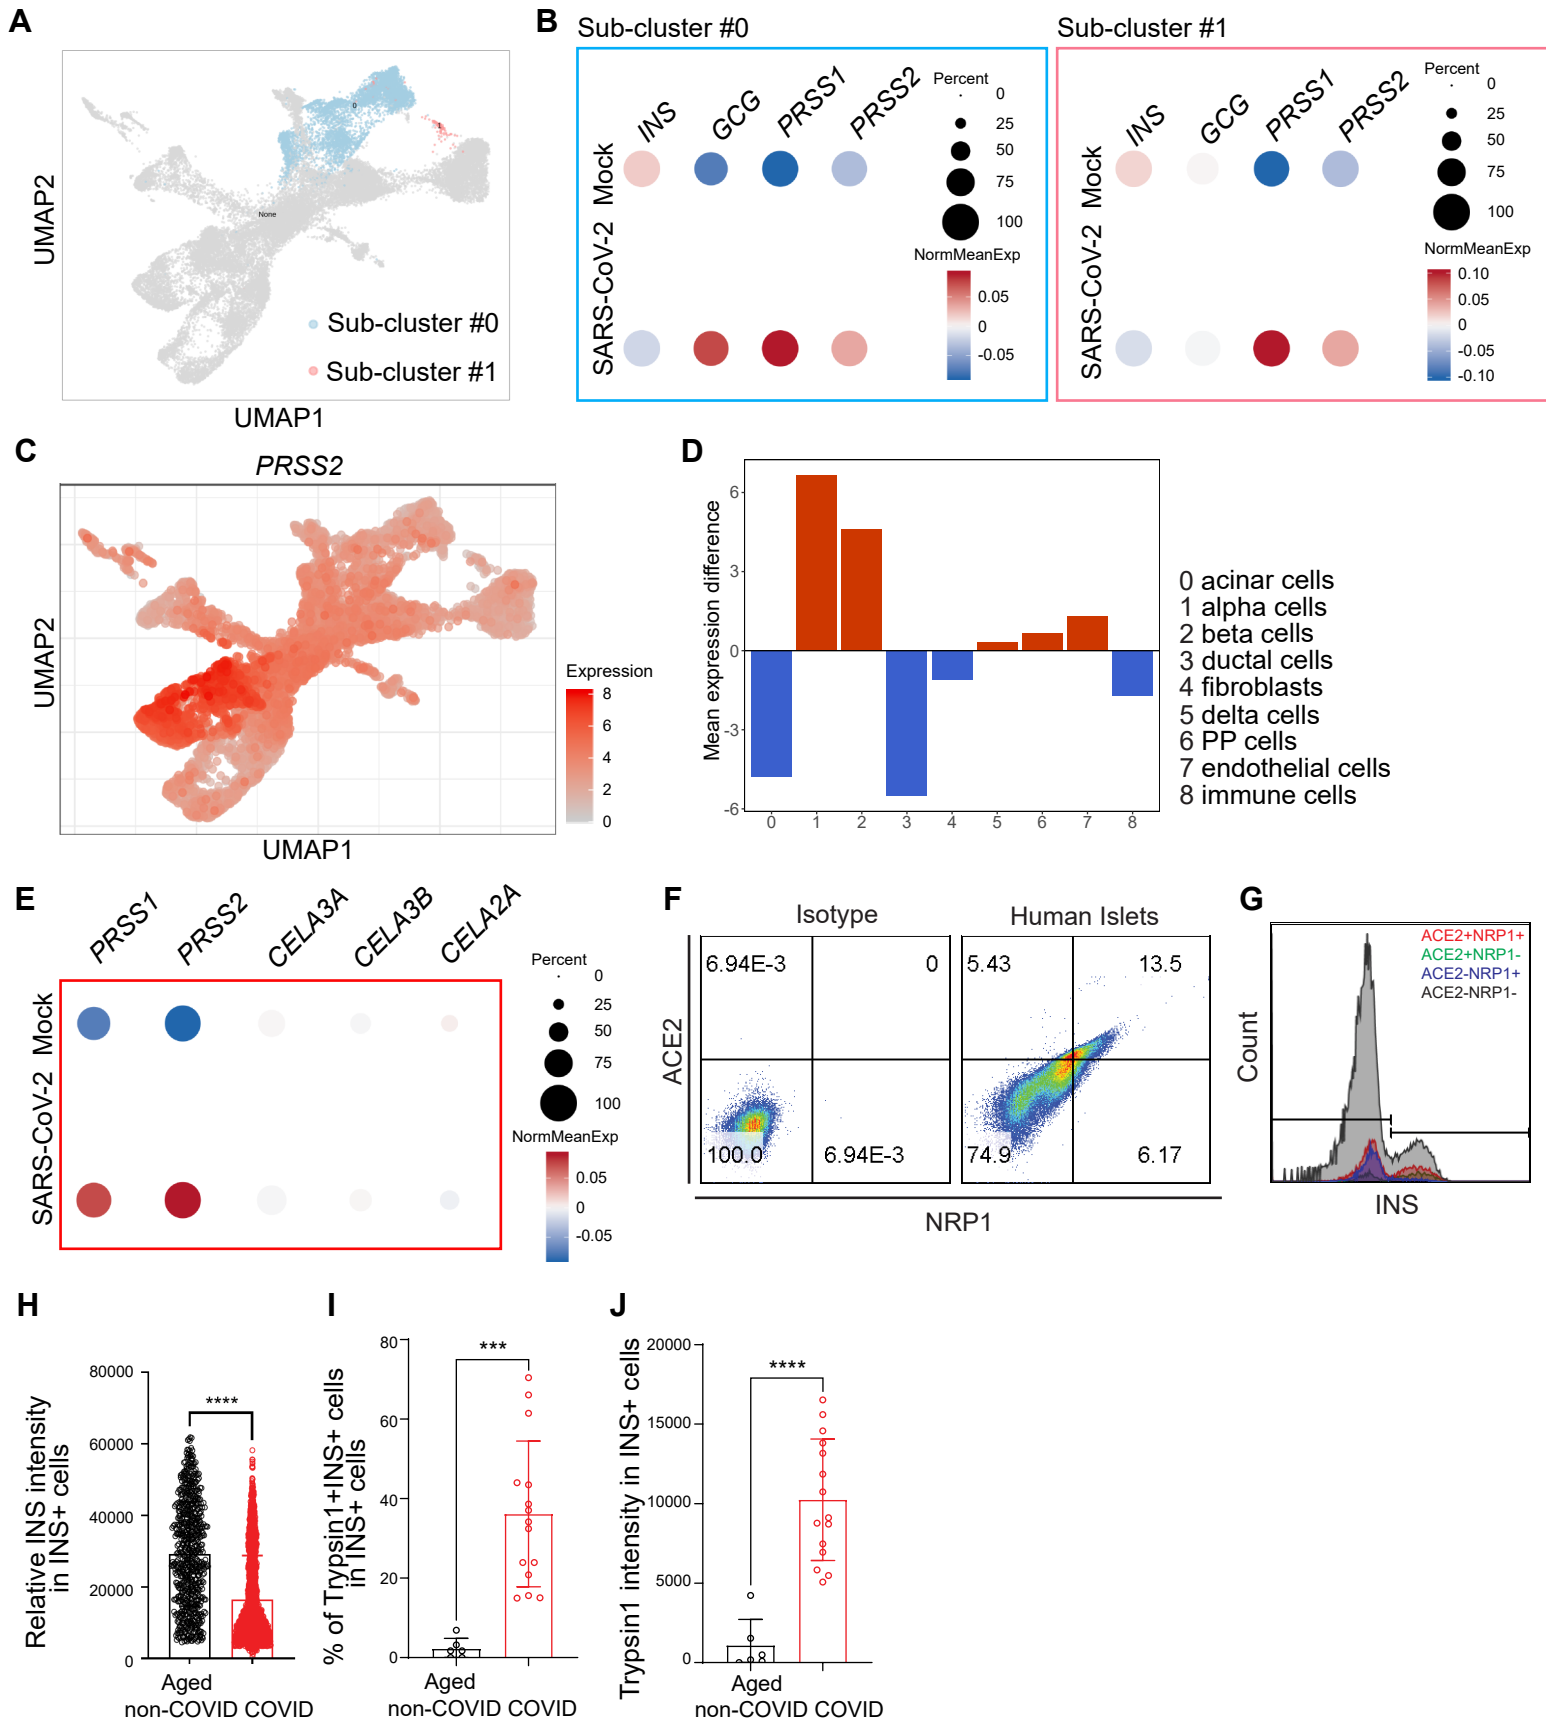

**Figure S4. Related to Figure 4. Human beta cells undergo transdifferentiation upon SARS-CoV-2 infection.**

(A) UMAP plot showing the two sub-clusters of beta cell population. ( $n = 2$  individual islet donors).

(B) Dot blot illustrating expression level of *INS*, *GCG*, *PRSS1*, *PRSS2* in two sub-clusters of mock versus SARS-CoV-2-infected human islets at 24 hpi (MOI=1). Dot size shows the fraction of cells with non-zero expression; Dot color indicates the relative expression level in the two conditions. ( $n = 2$  individual islet donors).

(C) UMAP plot showing the expression level of *PRSS2* of SARS-CoV-2 infected human islets. ( $n = 2$  individual islet donors).

(D) Bar plot illustrating mean expression difference of *PRSS2* between mock and SARS-CoV-2 infected cells in different clusters of human islets; Bar color indicates increased (red) or decreased (blue) expression in the SARS-CoV-2 infected cells. ( $n = 2$  individual islet donors).

(E) Dot blot illustrating expression level of acinar cell markers, including *PRSS1*, *PRSS2*, *CELA3A*, *CELA3B*, *CELA2A* in beta cell cluster of mock versus SARS-CoV-2-infected human islets at 24 hpi (MOI=1). Dot size shows the fraction of cells with non-zero expression; Dot color indicates the relative expression level in the two conditions. ( $n = 2$  individual islet donors).

(F and G) Flow cytometry analysis of SARS-CoV-2 (MOI=1) infected human islets at 48 hpi. Gating strategy of ACE2 and NRP1 (F). Insulin expression in ACE2<sup>+</sup>/NRP1<sup>+</sup>, ACE2<sup>+</sup>/NRP1<sup>-</sup>, ACE2<sup>-</sup>/NRP1<sup>+</sup>, and ACE2<sup>-</sup>/NRP1<sup>-</sup> cells (G). ( $n = 3$  replicates).

(H-J) Quantification of the relative *INS* intensity in *INS*<sup>+</sup> cells (H), the percentage of Tpsin1<sup>+</sup>*INS*<sup>+</sup> cells in *INS*<sup>+</sup> cells (I) and the average Tpsin1 intensity in *INS*<sup>+</sup> cells (J) of autopsy samples of COVID-19 subjects or age-matched non-COVID-19 subjects. Three images of each sample were used for quantification for each subject ( $n = 2$  individual non-COVID-19 subjects;  $n = 5$  individual COVID-19 subjects).

Data was presented as mean  $\pm$  STDEV. *P* values were calculated by paired or unpaired two-tailed Student's *t* test. \*\*\**P* < 0.001 and \*\*\*\**P* < 0.0001.

**Figure S5**

**A** **INS** **SARS-NDAPI** **INS** **SARS-N**

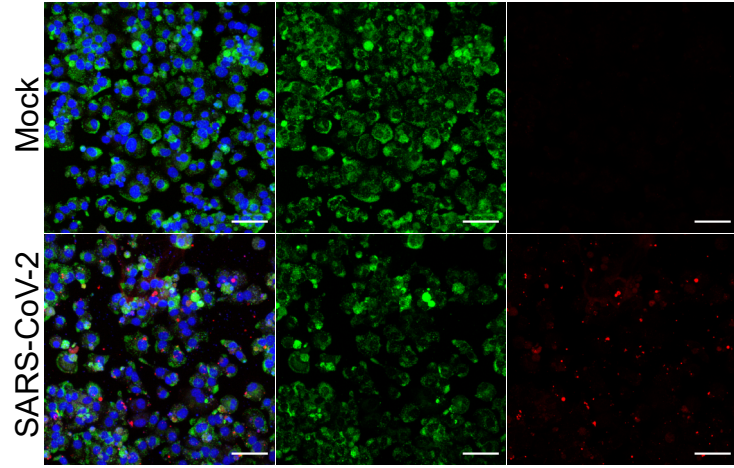

**B**

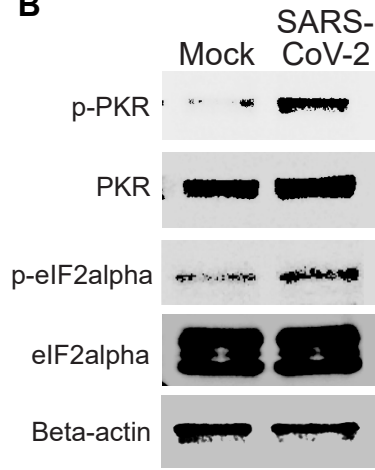

**C**

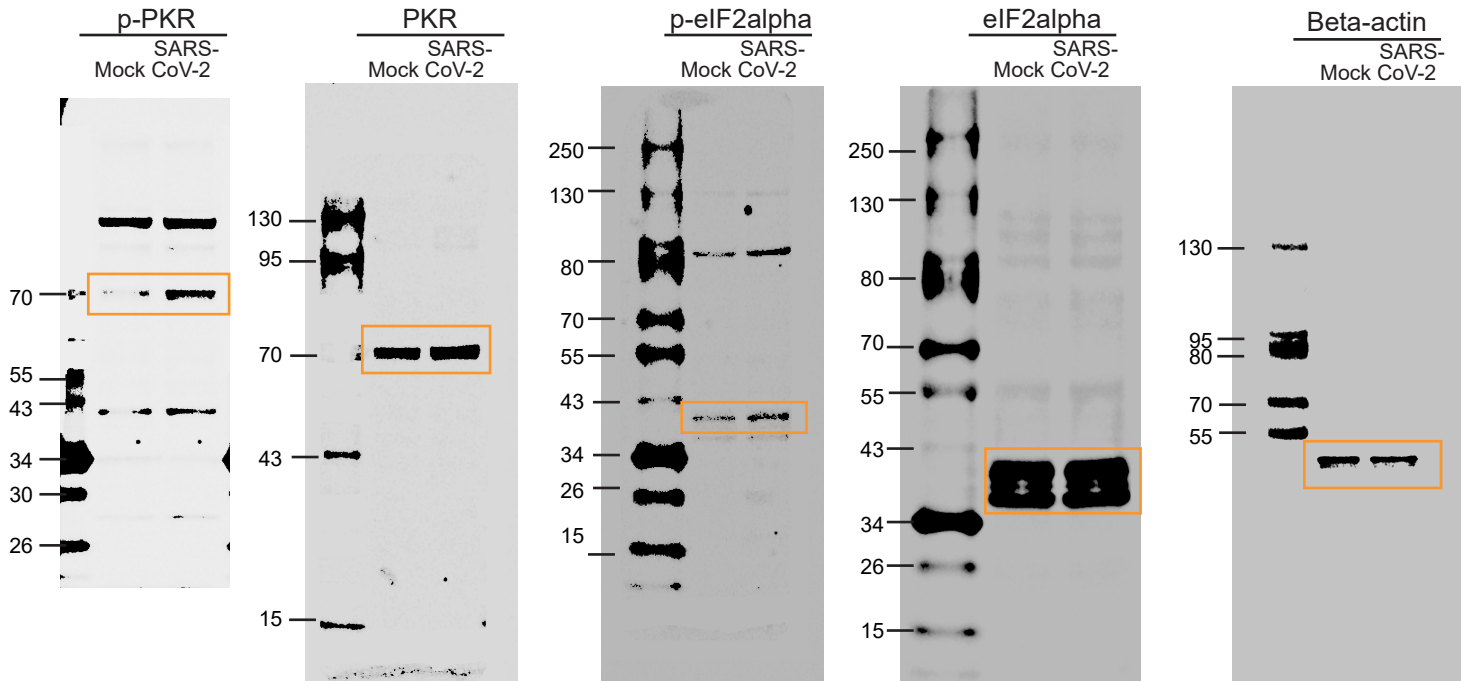

**D** **INS** **OPP** **DAPI** **INS** **OPP**

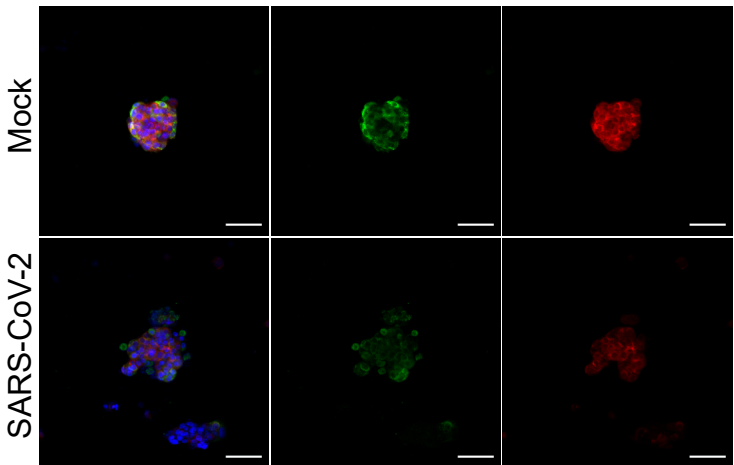

**E**

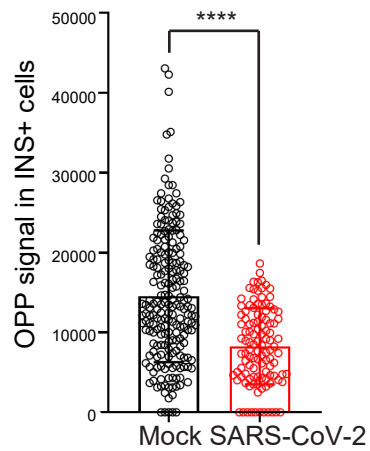

**Figure S5. Related to Figure 4. SARS-CoV-2 infection causes the change of eIF2 pathway and the decrease of protein synthesis.**

(A) Representative confocal images of INS and SARS-N of mock and SARS-CoV-2 (MOI=1) infected EndoC-betaH1 cells at 48 hpi (MOI=1). Scale bar = 50  $\mu$ m. Red: SARS-N; Green: INS; Blue: DAPI.

(B) Western blotting of p-PKR, PKR, p-eIF2alpha, eIF2alpha and beta-actin of mock and SARS-CoV-2 (MOI=1) infected EndoC-betaH1 cells at 48 hpi (MOI=1).

(C) Whole gel images of western blotting at (B).

(D and E) Representative confocal images of INS and OPP (O-propargyl-puromycin) (D) and quantification of OPP staining intensity (E) of mock versus SARS-CoV-2 infected human islets at 48 hpi ( $n = 3$  replicates, MOI=1). Scale bar = 50  $\mu$ m. Red: OPP; Green: INS; Blue: DAPI.

**Figure S6**

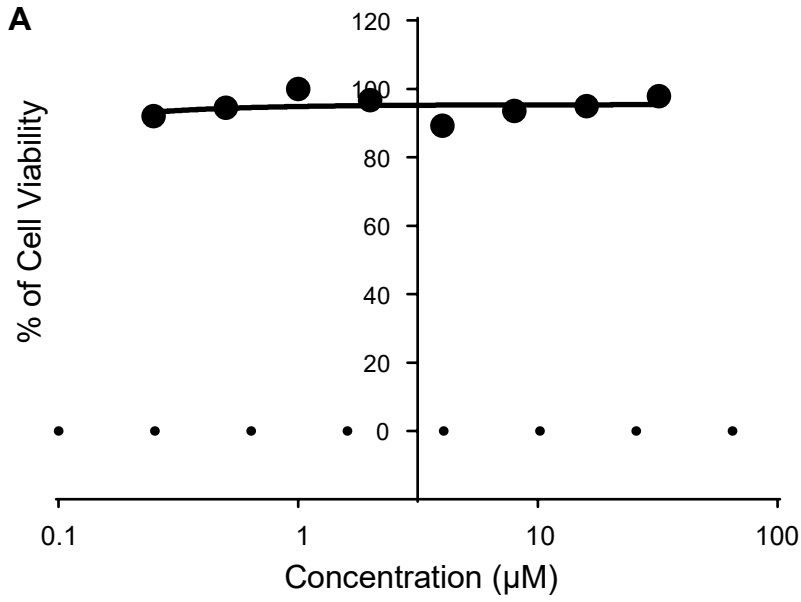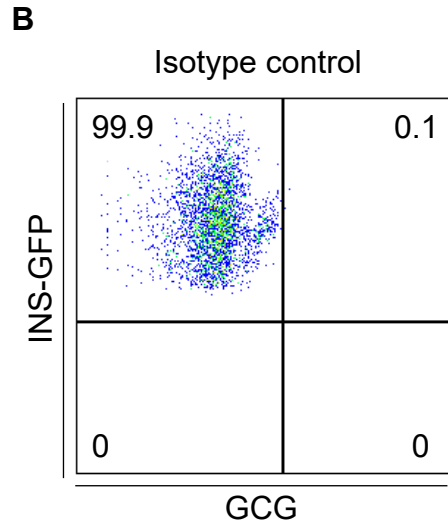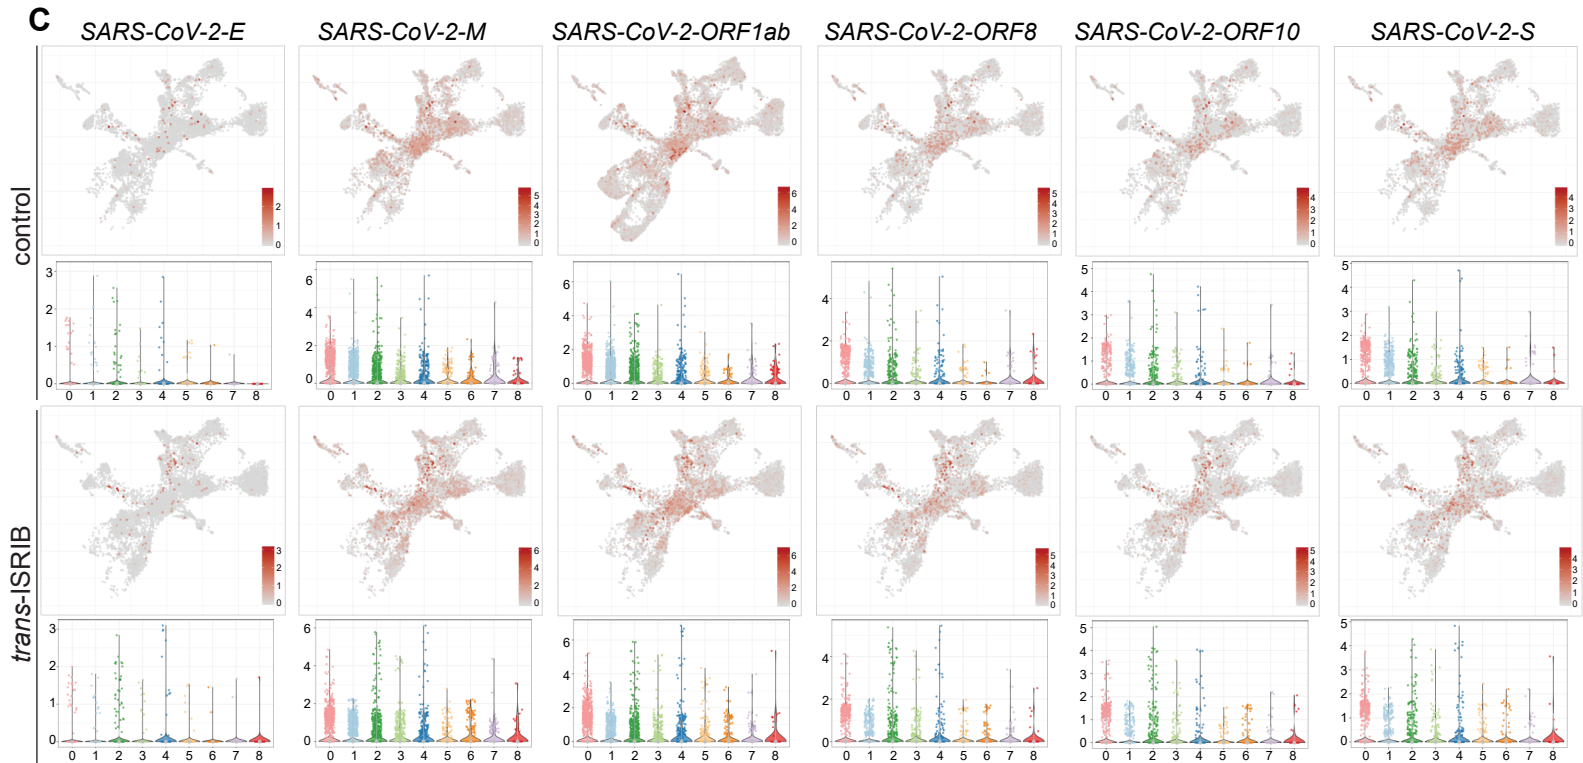

**Figure S6. Related to Figure 6 and 7. High-throughput chemical screen.**

(A) Toxicity curve of *trans*-ISRIB on hESC-derived *INS*-GFP<sup>+</sup> beta-like cells. Data was presented as mean  $\pm$  STDEV. ( $n = 3$  biological replicates).

(B) Isotype control of flow cytometry analysis of *trans*-ISRIB treated hESC-derived *INS*-GFP<sup>+</sup> beta-like cells.

(C) UMAP and violin plots showing the expression levels of SARS-CoV-2 genes of control or 10  $\mu$ M *trans*-ISRIB treated human islets at 24 hpi ( $n = 2$  individual islet donors, MOI=1).

**Figure S7**

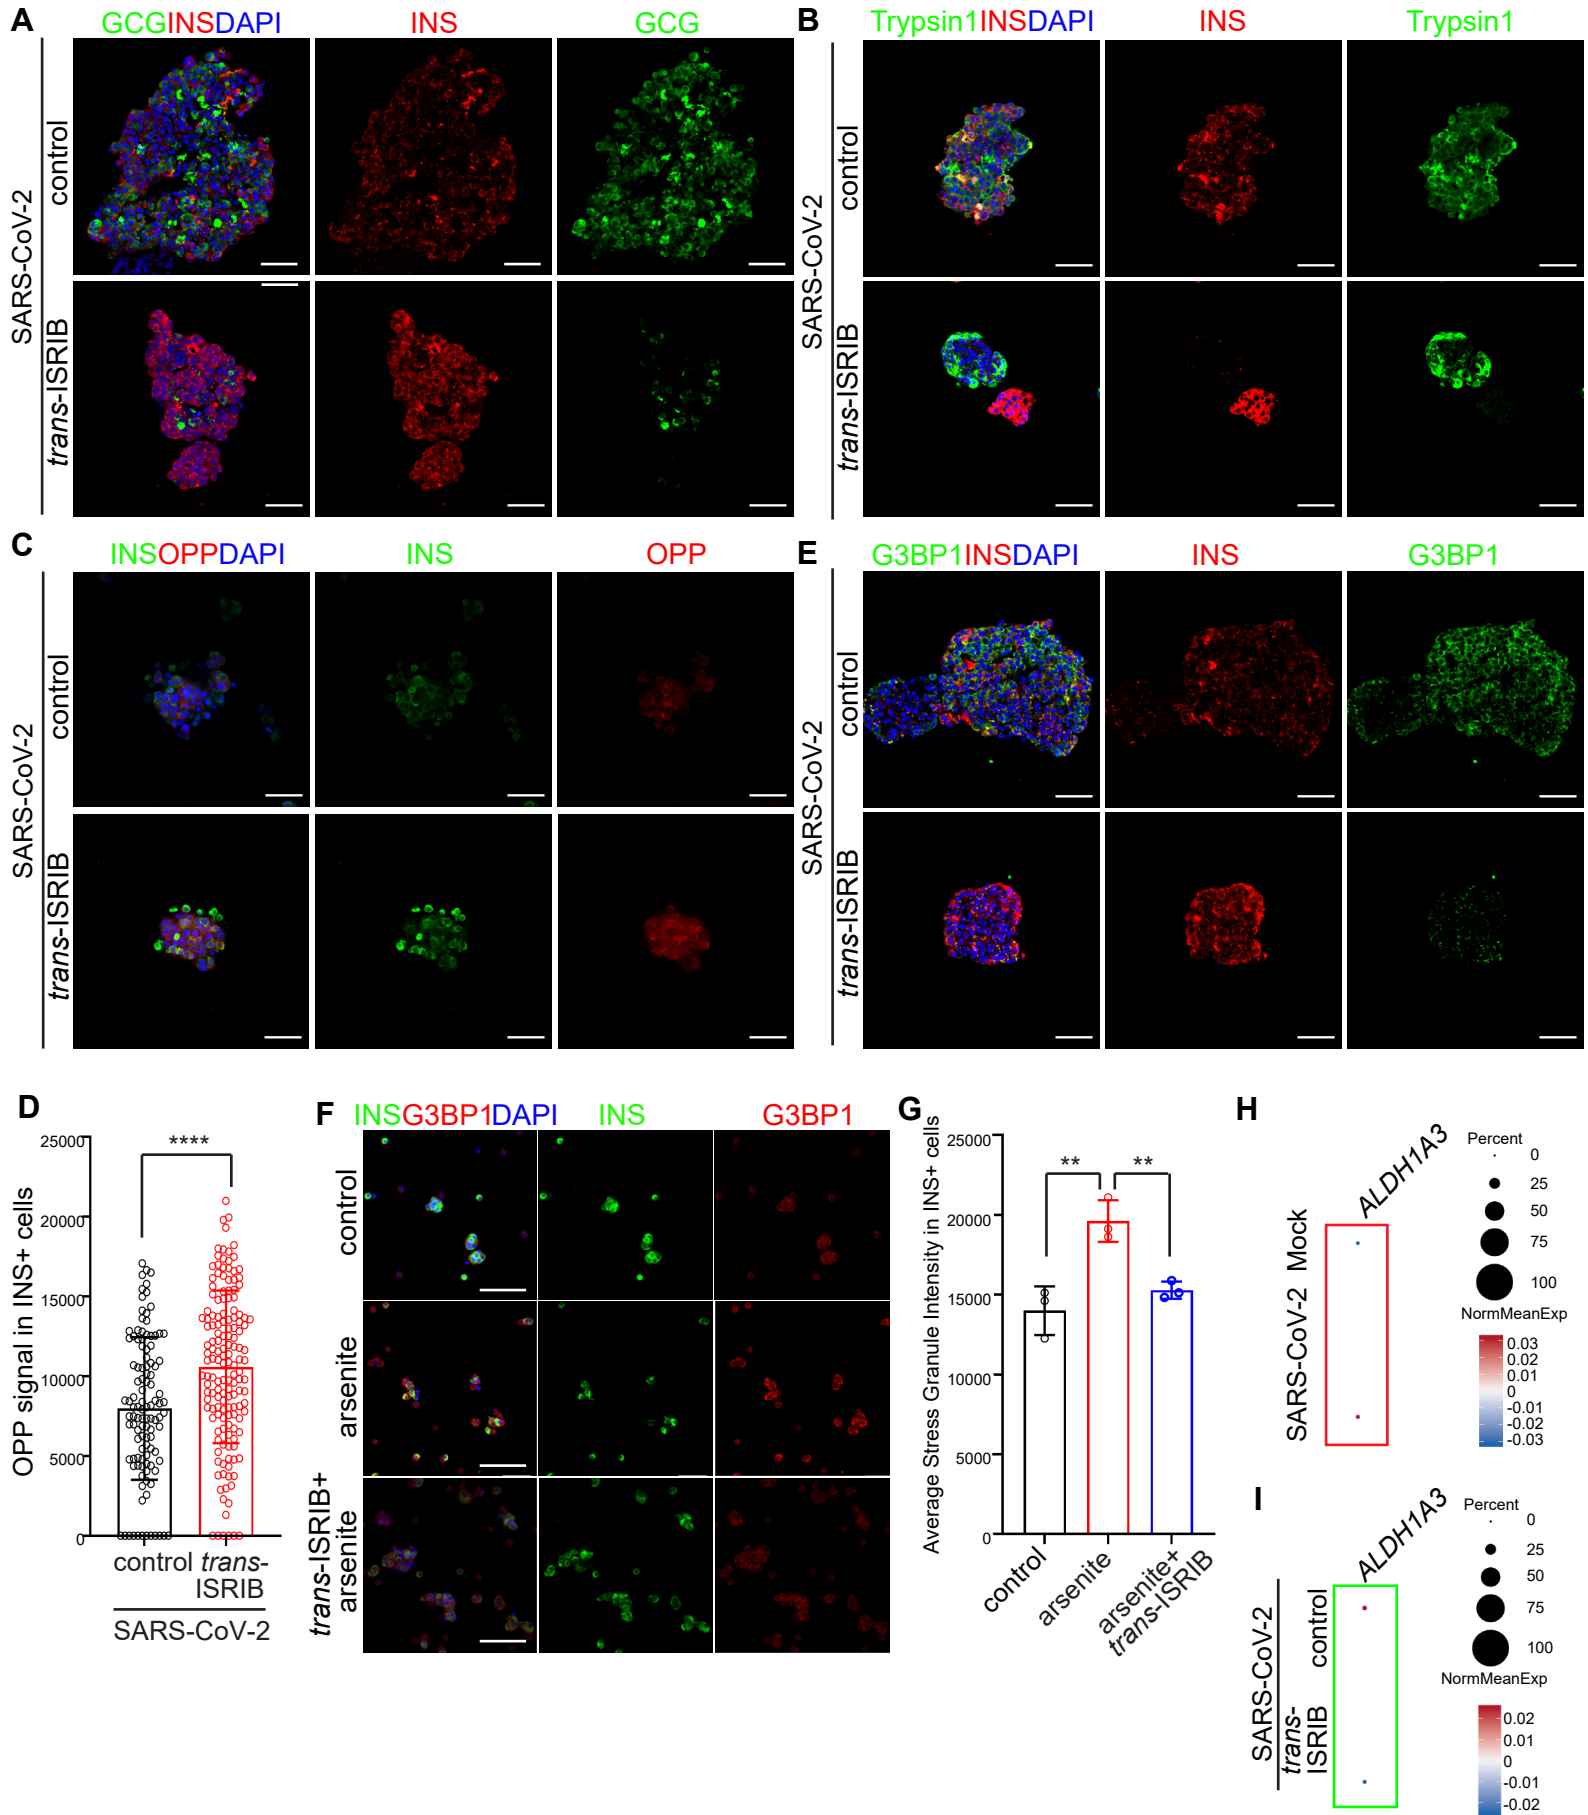

**Figure S7. Related to Figure 7. *Trans*-ISRIB blocks human beta cells transdifferentiation upon SARS-CoV-2 infection.**

(A) Representative confocal images of GCG and INS expression in control or 10  $\mu$ M *trans*-ISRIB treated human islets at 48 hpi ( $n = 3$  individual islet donors, MOI=1). Scale bar = 50  $\mu$ m. Red: INS; Green: GCG; Blue: DAPI.

(B) Representative confocal images of Tyspin1 and INS expression in control or 10  $\mu$ M *trans*-ISRIB treated human islets at 48 hpi ( $n = 3$  individual islet donors, MOI=1). Scale bar = 50  $\mu$ m. Red: INS; Green: Tyspin1; Blue: DAPI.

(C and D) Representative confocal images of INS and OPP (C) and quantification of OPP staining intensity (D) of control or 10  $\mu$ M *trans*-ISRIB treated human islets at 48 hpi ( $n = 3$  replicates, MOI=1). Scale bar = 50  $\mu$ m. Red: OPP; Green: INS; Blue: DAPI.

(E) Representative confocal images of G3BP1 and INS expression in control or 10  $\mu$ M *trans*-ISRIB treated human islets at 48 hpi ( $n = 3$  individual islet donors, MOI=1). Scale bar = 50  $\mu$ m. Red: INS; Green: G3BP1; Blue: DAPI.

(F and G) Representative confocal images of G3BP1 and INS (F) and quantification of G3BP1 expression (G) in control, 0.5 mM NaAsO<sub>2</sub> and 10  $\mu$ M *trans*-ISRIB+ 0.5 mM NaAsO<sub>2</sub> treated human islets after 30 min treatment ( $n = 3$  replicates). Scale bar = 50  $\mu$ m. Green: INS; Red: G3BP1; Blue: DAPI.

(H) Dot blot illustrating expression level of *ALDH1A3* in mock versus SARS-CoV-2 infected human islets at 24 hpi ( $n = 2$  individual islet donors, MOI=1).

(I) Dot blot illustrating expression level of *ALDH1A3* in control or 10  $\mu$ M *trans*-ISRIB treated human islets at 24 hpi ( $n = 2$  individual islet donors, MOI=1).

Dot size shows the fraction of cells with non-zero expression; Dot color indicates the relative expression level in the two conditions.

Data was presented as mean  $\pm$  STDEV. *P* values were calculated by paired or unpaired two-tailed Student's *t* test. \*\**P* < 0.01 and \*\*\*\**P* < 0.0001.



**Table S1. Related to Figure 1. Summary of samples.**

| Sample ID       | Gender | Age | Assays                                                    | Chronic comorbidities          | Inflammatory status WBC | COVID-19 disease course | Blood glucose level (mg/dL) |
|-----------------|--------|-----|-----------------------------------------------------------|--------------------------------|-------------------------|-------------------------|-----------------------------|
| COVID-19_1      | Female | 87  | Immunostaining                                            | DM2, HTN                       | 17.4                    | 7                       | 248                         |
| COVID-19_2      | Female | 70  | Immunostaining                                            | Dementia, DM2                  | 4.9                     | 12                      | 223                         |
| COVID-19_3      | Male   | 87  | Immunostaining                                            | None                           | 9.7                     | 26                      | 213                         |
| COVID-19_4      | Male   | 91  | Immunostaining                                            | Dementia, HTN                  | 6.8                     | 5                       | 229                         |
| COVID-19_5      | Female | 71  | Immunostaining                                            | Alzheimer's, HTN, AFIB         | 4.2                     | 7                       | 100                         |
| Non-COVID-19_1  | Male   | 75  | Immunostaining                                            | HTN, CAD                       | 18.9                    | N/A                     | 201                         |
| Non-COVID-19_2  | Female | 74  | Immunostaining                                            | CAD, mild HTN                  | 9.2                     | N/A                     | 190                         |
| Non-COVID-19_3  | Male   | 19  | Immunostaining                                            | Asthma                         | 20.4                    | N/A                     | 150                         |
| Non-COVID-19_4  | Male   | 27  | Immunostaining                                            | Ashama, HTN, OB                | 21.6                    | N/A                     | 137                         |
| Non-COVID-19_5  | Male   | 27  | SARS-CoV-2 infection, scRNA-seq and immunostaining        | Allergic rhinitis, pharyngitis | 7.7                     | N/A                     | 129                         |
| Non-COVID-19_6  | Female | 58  | SARS-CoV-2 infection, scRNA-seq and immunostaining, ELISA | HTN, Stroke                    | 12.4                    | N/A                     | 144                         |
| Non-COVID-19_7  | Male   | 52  | SARS-CoV-2 infection and immunostaining, ELISA            | HTN                            | 7.1                     | N/A                     | 104                         |
| Non-COVID-19_8  | Male   | 18  | SARS-CoV-2 infection, immunostaining, ELISA               | N/A                            | N/A                     | N/A                     | N/A                         |
| Non-COVID-19_15 | Male   | 50  | scRNA-seq (Table S3)                                      | N/A                            | N/A                     | N/A                     | N/A                         |
| Non-COVID-19_16 | Male   | 28  | scRNA-seq (Table S3)                                      | N/A                            | N/A                     | N/A                     | N/A                         |
| Non-COVID-19_17 | Male   | 35  | scRNA-seq (Table S3)                                      | N/A                            | N/A                     | N/A                     | N/A                         |

|                       |        |    |                      |     |     |     |     |
|-----------------------|--------|----|----------------------|-----|-----|-----|-----|
| Non-COVID-19_18       | Male   | 22 | scRNA-seq (Table S3) | N/A | N/A | N/A | N/A |
| Non-COVID-19_19       | Female | 41 | scRNA-seq (Table S3) | N/A | N/A | N/A | N/A |
| Non-COVID-19 (T2D)_20 | Male   | 61 | scRNA-seq (Table S3) | N/A | N/A | N/A | N/A |

DM2: diabetes mellitus, type 2; HTN: Hypertension; AFIB: Atrial fibrillation; CAD: Coronary Artery Disease; OB: obesity.

**Table S2. Related to Figure 1. The SARS-N<sup>+</sup> cells in autopsy samples\*.**

| Sample ID                                                                           | COVID-19_1  | COVID-19_2 | COVID-19_3 | COVID-19_4 | COVID-19_5 |
|-------------------------------------------------------------------------------------|-------------|------------|------------|------------|------------|
| # of SARS-N <sup>+</sup> INS <sup>+</sup> cells                                     | 6.5±2.0     | 9.7±4.7    | 14.5±4.8   | 8.0±7.0    | 23.6±7.5   |
| % of SARS-N <sup>+</sup> INS <sup>+</sup> cells in INS <sup>+</sup> cells           | 10.0±10.9%  | 15.7±15.3% | 7.7±4.1%   | 8.1±5.9%   | 12.0±9.1%  |
| # of SARS-N <sup>+</sup> KRT19 <sup>+</sup> cells                                   | 22.0±18.5   | 4.9±5.8    | 8.3±8.5    | 3.3±3.2    | 8.0±13.9   |
| % of SARS-N <sup>+</sup> KRT19 <sup>+</sup> cells in KRT19 <sup>+</sup> cells       | 9.0±6.8%    | 2.1±2.4%   | 7.8±6.6%   | 1.9±1.4%   | 3.0±5.1%   |
| # of SARS-N <sup>+</sup> CD31 <sup>+</sup> cells                                    | 29.3±6.0    | 34.1±22.6  | 3.0±3.0    | 9.3±3.5    | 1.6±1.5    |
| % of SARS-N <sup>+</sup> CD31 <sup>+</sup> cells in CD31 <sup>+</sup> cells         | 21.0±0.9%   | 27.4±13.1% | 4.1±4.8%   | 11.8±4.2%  | 2.3±2.3%   |
| # of SARS-N <sup>+</sup> VIM <sup>+</sup> cells                                     | 84.7±68.7   | 5.3±1.5    | 10.4±4.8   | 4.2±2.4    | 7.7±4.0    |
| % of SARS-N <sup>+</sup> VIM <sup>+</sup> cells in VIM <sup>+</sup> cells           | 16.3±10.8%  | 2.4±1.5%   | 2.6±1.0%   | 4.1±1.9%   | 4.1±0.4%   |
| # of SARS-N <sup>+</sup> Trypsin1 <sup>+</sup> cells                                | 133.7±111.4 | 4.0±1.0    | 21.6±15.9  | 18.2±4.4   | 5.7±4.5    |
| % of SARS-N <sup>+</sup> Trypsin1 <sup>+</sup> cells in Trypsin1 <sup>+</sup> cells | 15.4±11.0%  | 0.8±0.0%   | 2.9±2.1%   | 2.2±0.5%   | 1.2±1.0%   |

\*The staining was only performed using autopsy samples that contain viral transcripts as confirmed by qRT-PCR.

**Table S3. Related to Figure 2. The percentage of *FURIN*<sup>+</sup> or *CTSL*<sup>+</sup> cells in six human islet samples.**

|                   | <b>Percentage of <i>FURIN</i><sup>+</sup> cells<br/>(Mean±STDEV)</b> | <b>Percentage of <i>CTSL</i><sup>+</sup> cells<br/>(Mean±STDEV)</b> |
|-------------------|----------------------------------------------------------------------|---------------------------------------------------------------------|
| acinar cells      | 27.3±17.5                                                            | 25.9±19.0                                                           |
| alpha cells       | 23.5±13.8                                                            | 51.5±22.9                                                           |
| beta cells        | 31.1±19.0                                                            | 51.4±30.2                                                           |
| delta cells       | 33.1±12.1                                                            | 62.7±22.7                                                           |
| PP cells          | 36.6±26.0                                                            | 48.5±28.7                                                           |
| ductal cells      | 42.8±17.9                                                            | 51.3±24.6                                                           |
| fibroblasts       | 47.2±19.4                                                            | 76.1±18.5                                                           |
| endothelial cells | 32.8±32.8                                                            | 47.3±28.6                                                           |
| immune cells      | 29.9±17.8                                                            | 90.5±11.5                                                           |

**Table S4. Related to STAR Methods. Antibodies used for immunocytochemistry, intracellular flow cytometry analysis.**

| Usage           | Antibody                                                                              | Clone#     | Host       | Catalog #    | Vendor                      | Dilution |
|-----------------|---------------------------------------------------------------------------------------|------------|------------|--------------|-----------------------------|----------|
| Immuno-staining | Polyclonal Guinea Pig Anti-Insulin                                                    | Polyclonal | Guinea Pig | #A0564       | Dako                        | 1:500    |
| Immuno-staining | Anti-Glucagon antibody                                                                | Monoclonal | Mouse      | #ab10988     | Abcam                       | 1:1,000  |
| Immuno-staining | Human/Mouse Somatostatin Antibody                                                     | Monoclonal | Rat        | #MAB2358     | R&D Systems                 | 1:100    |
| Immuno-staining | Pancreatic Polypeptide/PP Antibody                                                    | Polyclonal | Goat       | #NB100-1793  | NOVUS Biologicals           | 1:200    |
| Immuno-staining | Human Serpin A1/alpha 1-Antitrypsin Antibody                                          | Monoclonal | Mouse      | #MAB1268     | R&D Systems                 | 1:200    |
| Immuno-staining | Trypsin1/PRSS1 Antibody                                                               | Polyclonal | Sheep      | #AF3848      | NOVUS Biologicals           | 1:2,500  |
| Immuno-staining | Anti-Cytokeratin 19 antibody                                                          | Monoclonal | Mouse      | # ab7754     | Abcam                       | 1:200    |
| Immuno-staining | Human CD31/PECAM-1 Antibody                                                           | Polyclonal | Sheep      | #AF806       | R&D Systems                 | 1:200    |
| Immuno-staining | Vimentin antibody                                                                     | Monoclonal | Mouse      | #ab8978      | Abcam                       | 1:200    |
| Immuno-staining | NRP1 antibody                                                                         | Monoclonal | Rabbit     | #ab81321     | Abcam                       | 1:200    |
| Immuno-staining | NRP1 antibody                                                                         | Monoclonal | Rabbit     | #ST05-30     | NOVUS Biologicals           | 1:200    |
| Immuno-staining | G3BP1 Antibody                                                                        | Polyclonal | Rabbit     | #17798       | Cell Signaling Technology   | 1:500    |
| Immuno-staining | SARS-CoV/SARS-CoV-2 Nucleocapsid Antibody                                             | Monoclonal | Rabbit     | #40143-R001  | Sino Biological             | 1:500    |
| Immuno-staining | Human ACE-2 Antibody                                                                  | Polyclonal | Goat       | #AF933       | R & D Systems               | 1:400    |
| Immuno-staining | Alexa Fluor 488 AffiniPure Donkey Anti-Guinea Pig IgG (H+L)                           | Polyclonal | Donkey     | #706-545-148 | Jackson ImmunoResearch Labs | 1:1,000  |
| Immuno-staining | Donkey anti-Mouse IgG (H+L) Highly Cross-Adsorbed Secondary Antibody, Alexa Fluor 488 | Polyclonal | Donkey     | #A-21202     | Thermo Fisher Scientific    | 1:1,000  |

|                 |                                                                                       |            |            |              |                             |         |
|-----------------|---------------------------------------------------------------------------------------|------------|------------|--------------|-----------------------------|---------|
| Immuno-staining | Donkey anti-Mouse IgG (H+L) Highly Cross-Adsorbed Secondary Antibody, Alexa Fluor 594 | Polyclonal | Donkey     | #A-21203     | Thermo Fisher Scientific    | 1:1,000 |
| Immuno-staining | Donkey anti-Mouse IgG (H+L) Highly Cross-Adsorbed Secondary Antibody, Alexa Fluor 647 | Polyclonal | Donkey     | #A-31571     | Thermo Fisher Scientific    | 1:1,000 |
| Immuno-staining | Donkey anti-Rabbit IgG (H+L) Secondary Antibody, Alexa Fluor 594 conjugate            | Polyclonal | Donkey     | #A-21207     | Thermo Fisher Scientific    | 1:1,000 |
| Immuno-staining | Donkey anti-Rabbit IgG (H+L) Secondary Antibody, Alexa Fluor 647 conjugate            | Polyclonal | Donkey     | #A-31573     | Thermo Fisher Scientific    | 1:1,000 |
| Immuno-staining | Donkey anti-Goat IgG (H+L) Cross-Adsorbed Secondary Antibody, Alexa Fluor 488         | Polyclonal | Donkey     | #A-11055     | Thermo Fisher Scientific    | 1:1,000 |
| Immuno-staining | Donkey anti-Rat IgG (H+L) Highly Cross-Adsorbed Secondary Antibody, Alexa Fluor 488   | Polyclonal | Donkey     | #A-21208     | Thermo Fisher Scientific    | 1:1,000 |
| Immuno-staining | Donkey anti-Sheep IgG (H+L) Cross-Adsorbed Secondary Antibody, Alexa Fluor 488        | Polyclonal | Donkey     | #A-11015     | Thermo Fisher Scientific    | 1:1,000 |
| Flow Cytometry  | Polyclonal Guinea Pig Anti-Insulin                                                    | Polyclonal | Guinea Pig | #A0564       | Dako                        | 1:500   |
| Flow Cytometry  | Anti-Glucagon antibody                                                                | Monoclonal | Mouse      | #ab10988     | Abcam                       | 1:1,000 |
| Flow Cytometry  | Neuropilin-1 antibody                                                                 | Polyclonal | Sheep      | #AF3870      | NOVUS Biologicals           | 1:200   |
| Flow Cytometry  | Alexa Fluor 488 AffiniPure Donkey Anti-Guinea Pig IgG (H+L)                           | Polyclonal | Donkey     | #706-545-148 | Jackson ImmunoResearch Labs | 1:1,000 |
| Flow Cytometry  | Donkey anti-Mouse IgG (H+L) Highly Cross-Adsorbed Secondary Antibody, Alexa Fluor 647 | Polyclonal | Donkey     | #A-31571     | Thermo Fisher Scientific    | 1:1,000 |

|                |                                                                            |            |        |            |                          |          |
|----------------|----------------------------------------------------------------------------|------------|--------|------------|--------------------------|----------|
| Flow Cytometry | Goat anti-Rabbit IgG (H+L) Cross-Adsorbed Secondary Antibody, Pacific Blue | Polyclonal | Goat   | #P-10994   | Thermo Fisher Scientific | 1:1,000  |
| Western Blot   | eIF2alpha Rabbit mAb                                                       | Monoclonal | Rabbit | #5324S     | Cell Signaling           | 1:1,000  |
| Western Blot   | Phospho-eIF2alpha (Ser51) Rabbit mAb                                       | Monoclonal | Rabbit | #3398S     | Cell Signaling           | 1:1,000  |
| Western Blot   | PKR Rabbit mAb                                                             | Monoclonal | Rabbit | #12297S    | Cell Signaling           | 1:1,000  |
| Western Blot   | $\beta$ -Actin Rabbit mAb #8457                                            | Monoclonal | Rabbit | #8457S     | Cell Signaling           | 1:1,000  |
| Western Blot   | Recombinant Anti-PKR (phospho T446) antibody                               | Monoclonal | Rabbit | #ab32036   | Abcam                    | 1:1,000  |
| Western Blot   | IRDye <sup>®</sup> 800CW Donkey anti-Rabbit IgG Secondary Antibody         | Polyclonal | Donkey | #926-32213 | LI-COR                   | 1:15,000 |

**Table S5. Related to STAR Methods. Primers used for qRT-PCR.**

| <b>Primer name</b>      | <b>Sequence</b>                     |
|-------------------------|-------------------------------------|
| <i>ACTB-human-F</i>     | <i>CGTCACCAACTGGGACGACA</i>         |
| <i>ACTB- human-R</i>    | <i>CTTCTCGCGGTTGGCCTTGG</i>         |
| <i>SARS-CoV-2-TRS-F</i> | <i>CTCTTGTAGATCTGTTCTCTAAACGAAC</i> |
| <i>SARS-CoV-2-TRS-R</i> | <i>GGTCCACCAAACGTAATGCG</i>         |
| <i>SARS-CoV-2-N-R</i>   | <i>TAATCAGACAAGGAACTGATTA</i>       |
| <i>SARS-CoV-2-N-R</i>   | <i>CGAAGGTGTGACTTCCATG</i>          |
| <i>SARS-CoV-2-E-F</i>   | <i>ACAGGTACGTTAATAGTTAATAGCGT</i>   |
| <i>SARS-CoV-2-E-R</i>   | <i>ATATTGCAGCAGTACGCACACA</i>       |
| <i>18S-F</i>            | <i>GGCCCTGTAATTGGAATGAGTC</i>       |
| <i>18S-R</i>            | <i>CCAAGATCCAACCTACGAGCTT</i>       |
